# Supplementary material
Source: PubMed Central journal article supplement (PMC7061992)
Supplement: rstb20190417supp1.pdf [file rstb20190417supp1.pdf]

# Supplementary Figure 1: miRNA-normalized abundance of TE small RNAs

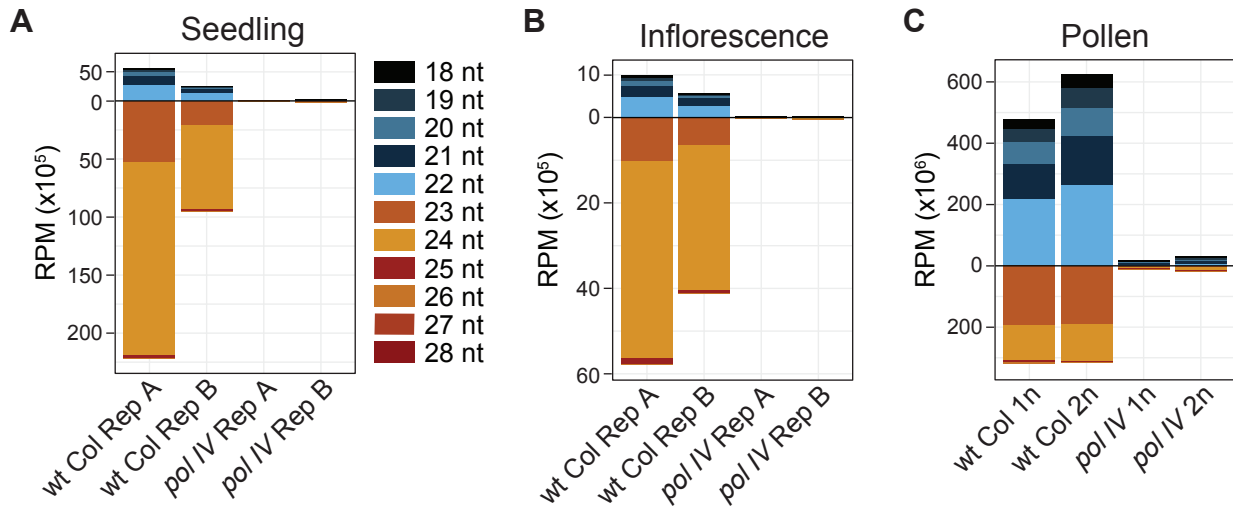

Reads per million (RPM) sequenced miRNAs of TE siRNAs in wt Col and *pol IV* mutant plants in three different tissue types - seedling, inflorescence and pollen. For each tissue type Pol IV-independent miRNAs were determined by comparing sRNA abundances between wt Col and *pol IV* mutant plants. The counts of Pol IV-independent miRNAs were then used to normalize tissue specific accumulation of TE siRNAs.
