# Supplementary material
Source: PubMed Central journal article supplement (PMC7061992)
Supplement: rstb20190417supp2.pdf [file rstb20190417supp2.pdf]

# Supplementary Figure 2: Investigation of Pol IV-dependent sRNAs in *dcl1/2/3/4* quadruple mutant

**A** Pol IV 24 nt siRNA clusters

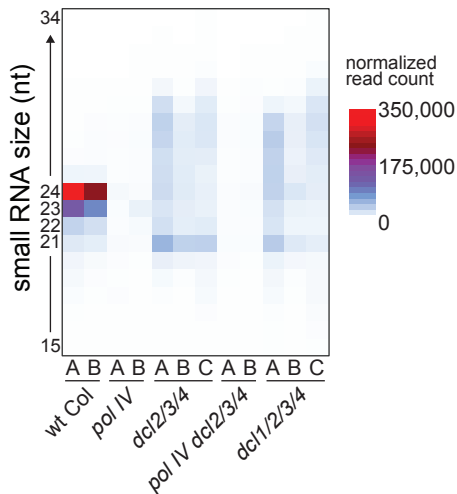

**B** Pol IV 21-22 nt sRNA clusters

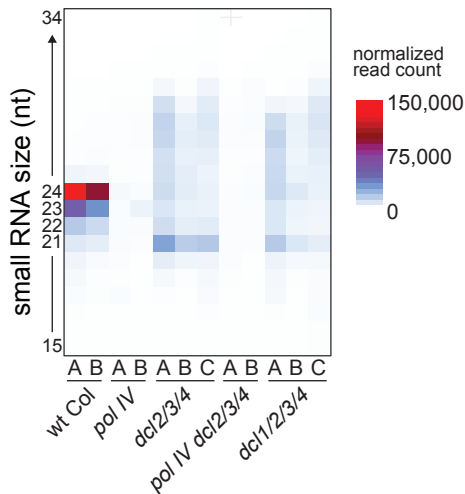

Heatmap of read counts of 15-34 nt small RNAs from Pol IV-dependent clusters in various dicer mutant combinations including the *dcl1/2/3/4* quadruple mutant from a seedling dataset (18). *dcl1/2/3/4* refers to the *dcl1/dcl2/dcl3/dcl4* quadruple mutant.
