# Supplementary material
Source: PubMed Central journal article supplement (PMC7061992)
Supplement: rstb20190417supp3.pdf [file rstb20190417supp3.pdf]

### Supplementary Figure 3: Developmental expression pattern of factors involved in Pol IV-dependent sRNA production

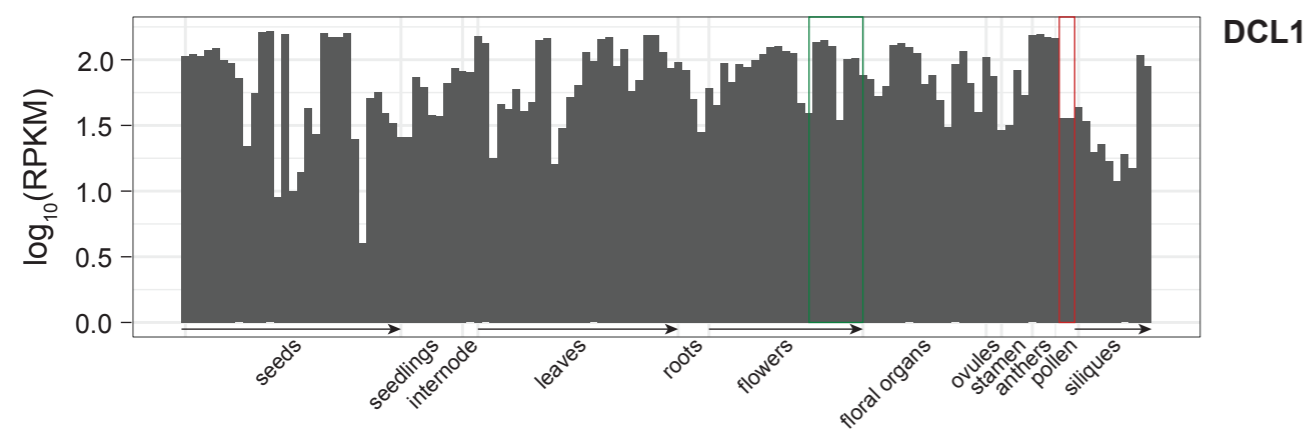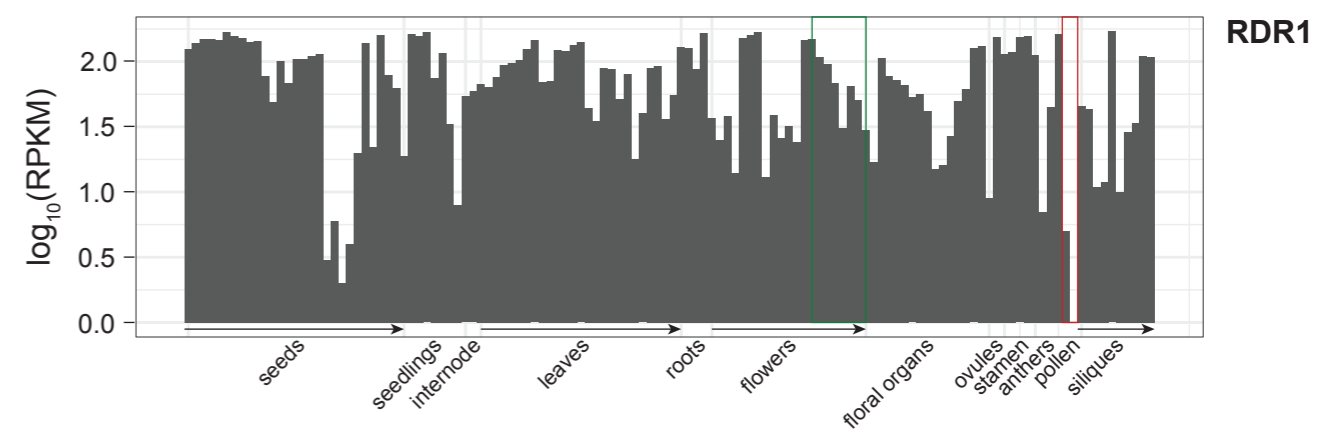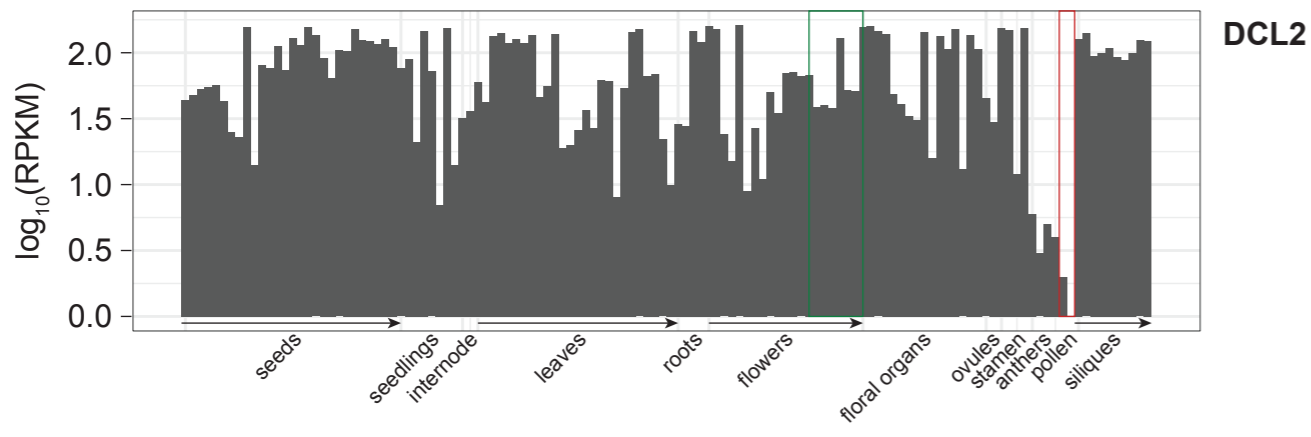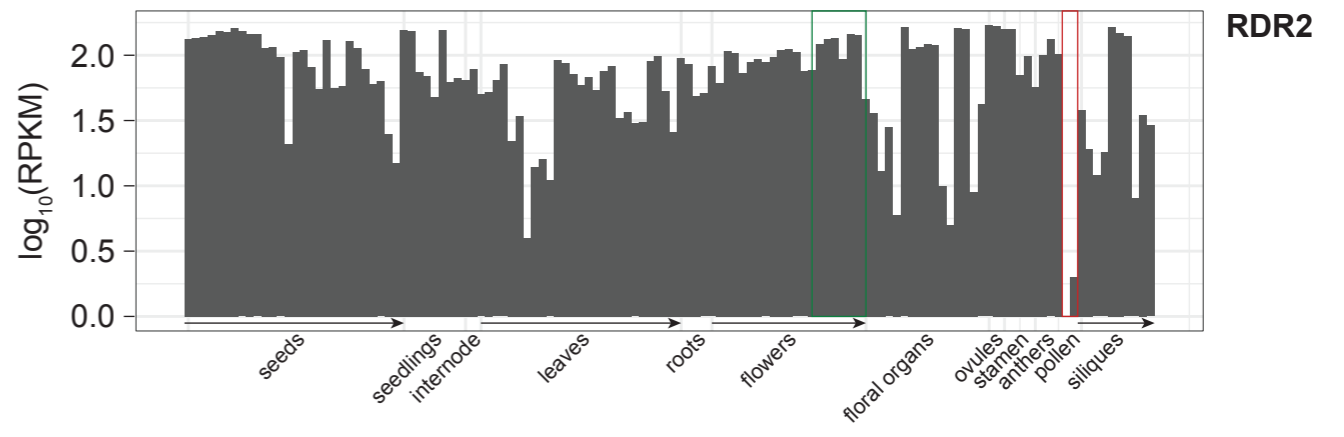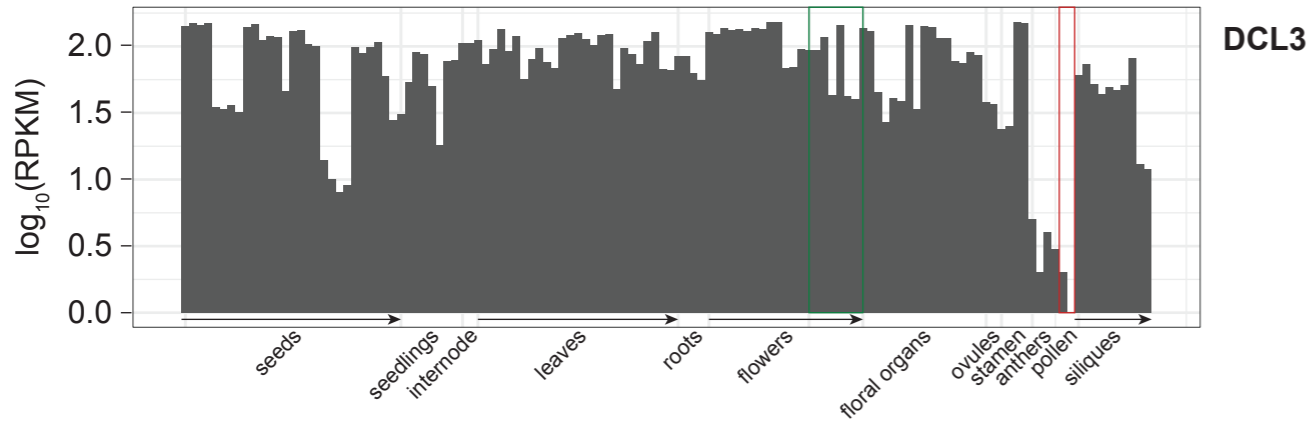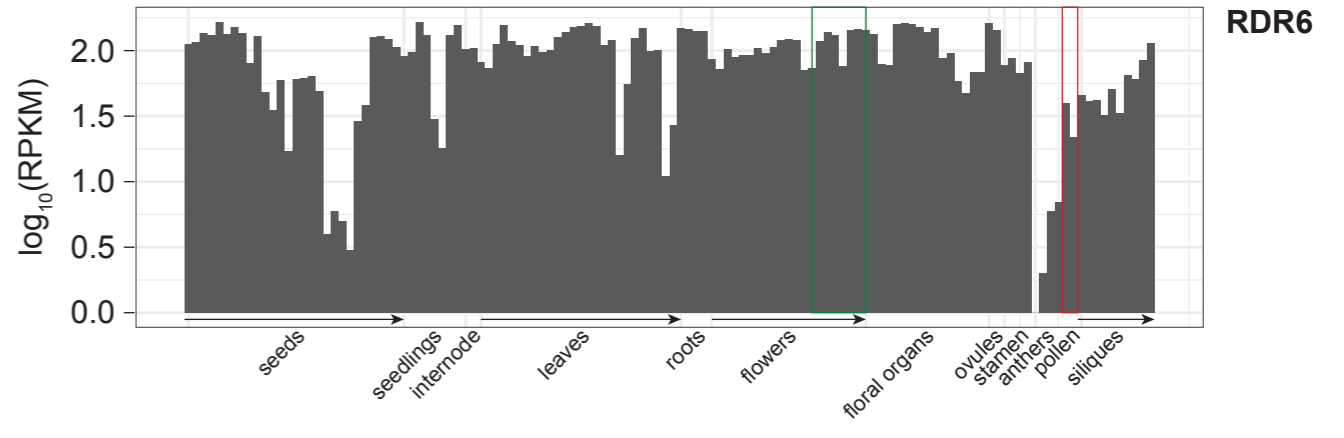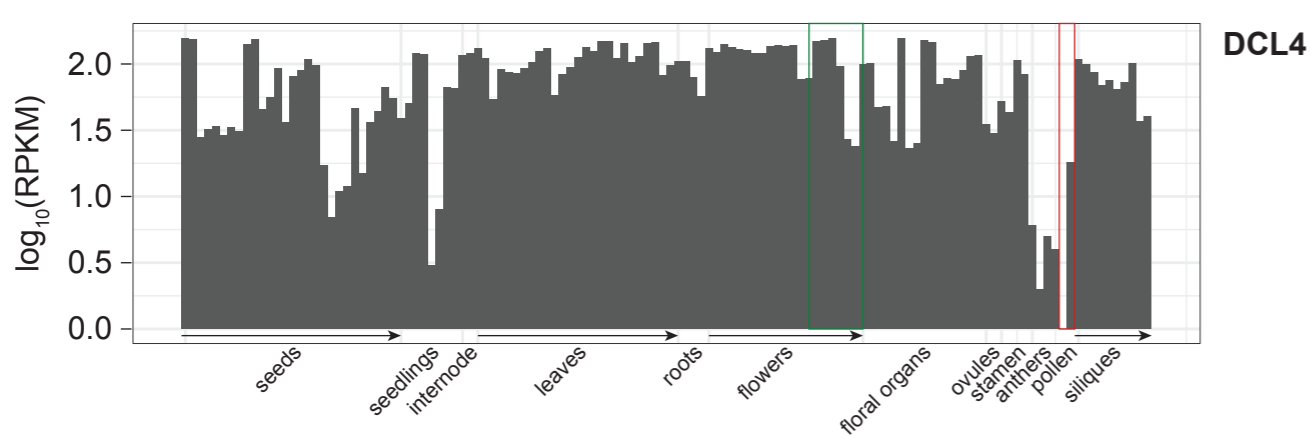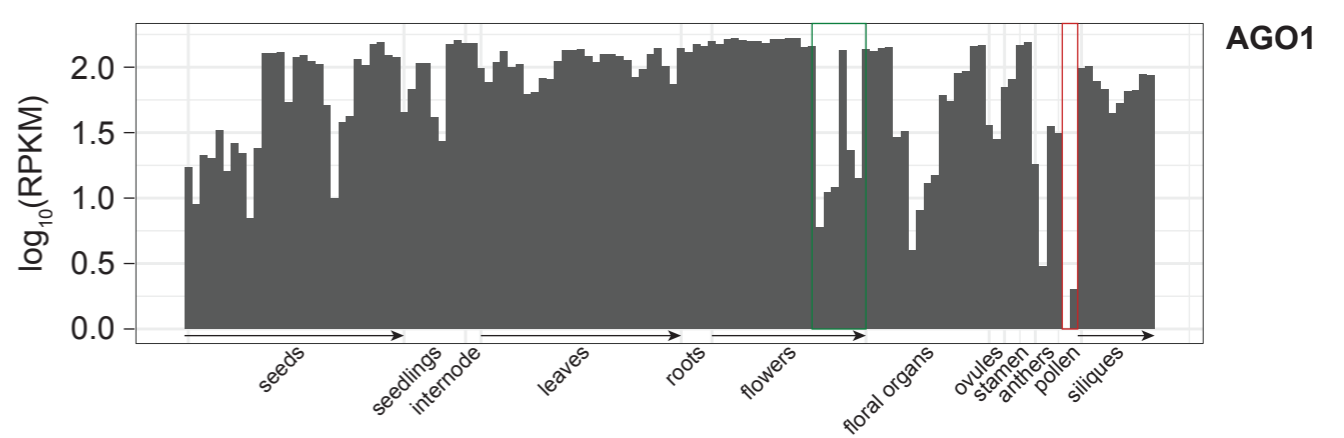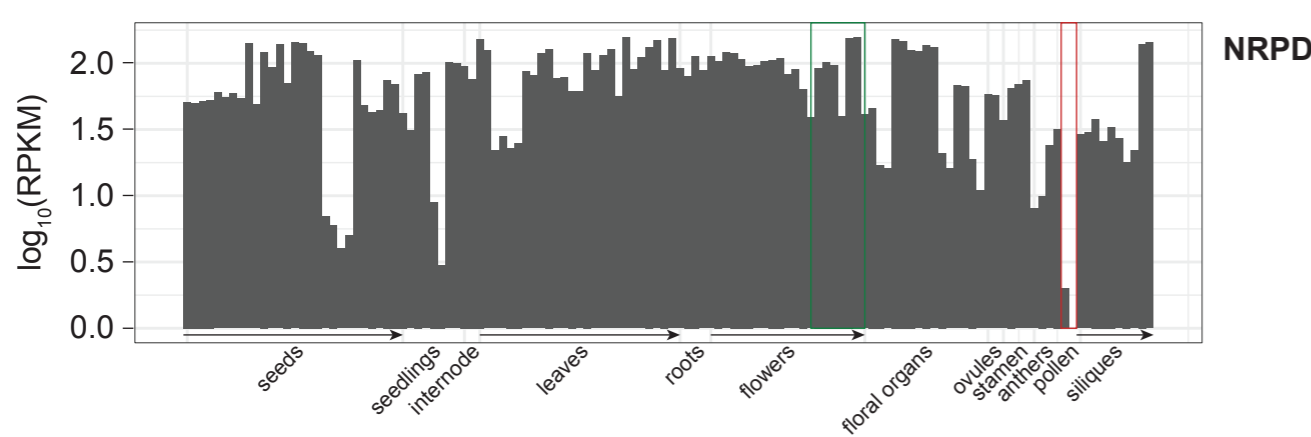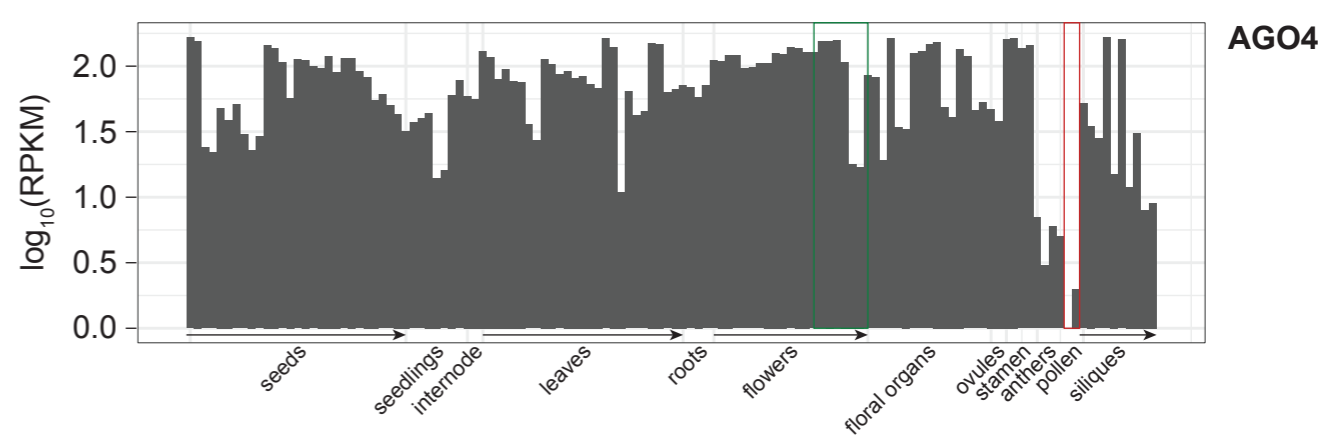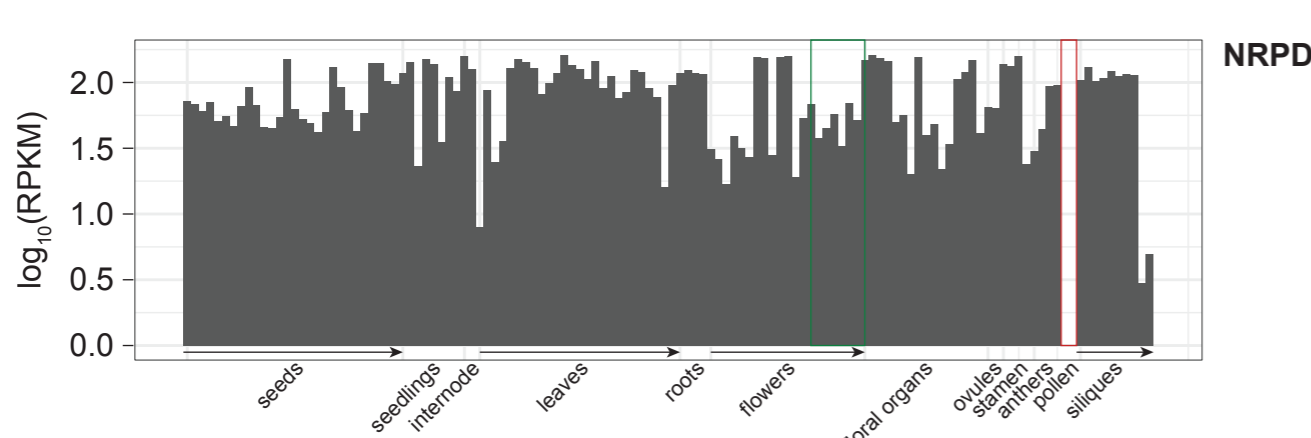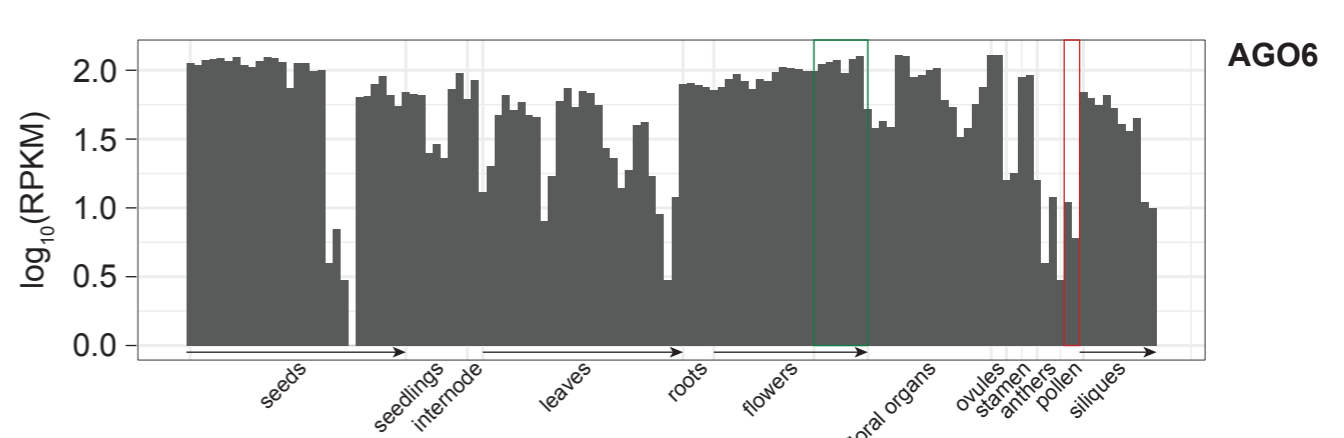

RPKM expression values of various proteins involved in Pol IV-dependent sRNA production of Pol IV-dependent RNA-directed DNA methylation (RdDM). Data were accessed from eFP-Seq Browser (42). Klepikova et al's data (41) were used to show expression in differential developmental time points. Green box shows the inflorescence tissue used for almost all data reported in this study (unless specified otherwise). Red box highlights the pollen developmental time during which multiple factors are less expressed.
