# Supplementary material
Source: PubMed Central journal article supplement (PMC7061992)
Supplement: rstb20190417supp4.pdf [file rstb20190417supp4.pdf]

# Supplementary Figure 4: Pol IV 21-22 nt siRNAs are enriched in AGO1

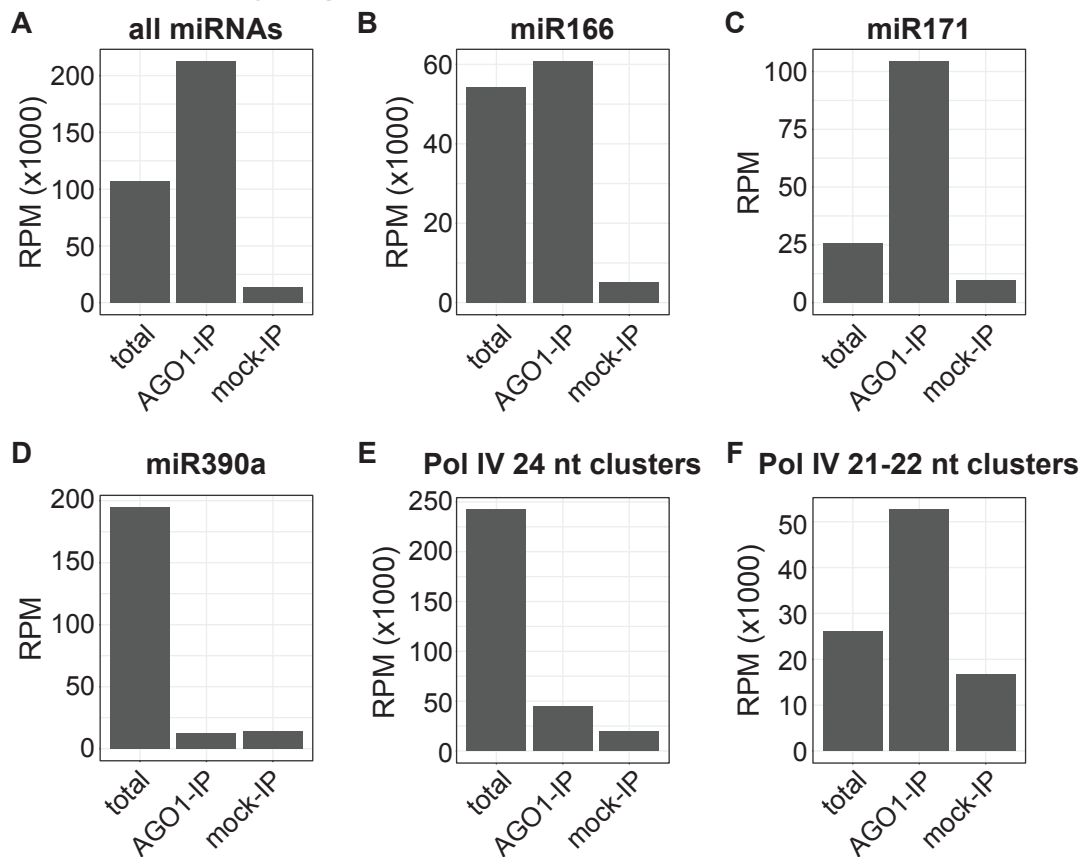

sRNA accumulation from different loci is shown in total, AGO1-IP or negative control mock-IP samples in wt Col inflorescence tissue. A) High enrichment of all miRNAs in AGO1-IP vs mock-IP. B) and C) Positive controls miR166 and miR171 [45] show high enrichment of specific mature miRNA in AGO1. D) miRNA 390a is known to be incorporated specifically into AGO7 and not AGO1 [45,46] and is shown here as a negative control demonstrating no enrichment of mature miRNA in AGO1-IP vs mock. E) Only a subset of 24 nt sRNA from Pol IV 24 nt clusters are incorporated into AGO1-IP ( $\text{AGO1-IP}/\text{total} < 0.2$ ) but the ones that do are enriched compared to mock ( $\text{AGO1-IP}/\text{mock IP} > 2$ ). and F) 21-22 nt sRNAs from Pol IV 21-22 nt clusters show genome-wide enrichment into AGO1 ( $\text{AGO1-IP}/\text{total} > 2$ ) like all miRNAs in A. AGO1-IP/mock enrichment ( $>3$ ) is not as high as miRNAs but higher than the negative control miR390a. Together these data demonstrate that Pol IV-dependent 21-22 nt sRNAs are incorporated into AGO1.
